# Supplementary material for: The 2013 Earthquake Series in the Southern Vienna Basin: location
Source: Copernicus journal article supplement (doi:10.5194/adgeo-36-77-2014), 2014-08-27
Supplement: Supplementary file 1 [file adgeo-36-77-2014-supplement.zip]

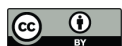

## *Supplement of*

# **The 2013 Earthquake Series in the Southern Vienna Basin: location**

**M.-T. Apoloner et al.**

*Correspondence to:* M.-T. Apoloner ([maria-theresia.apoloner@univie.ac.at](mailto:maria-theresia.apoloner@univie.ac.at))

- Supplement-Cover-Letter.pdf
- EB2013\_Events\_ZAMGBulletin\_NLLoc.xml
